# Supplementary material
Source: PubMed Central journal article supplement (PMC8491020)
Supplement: kiab356_supplementary_data.pdf [file kiab356_supplementary_data.pdf]

## **SUPPLEMENTAL MATERIAL**

### ***GLABRA2*-based selection efficiently enriches Cas9-generated non-chimeric *Arabidopsis* mutants in T1 generation**

Xiangjiu Kong<sup>a, 2</sup>, Wenbo Pan<sup>b, 2</sup>, Nengxu Sun<sup>a</sup>, Tingyu Zhang<sup>a</sup>, Lijing Liu<sup>a, 3, 4</sup> &

Huawei Zhang<sup>b, 3, 4</sup>

Author for communication: huawei.zhang@pku-iaas.edu.cn

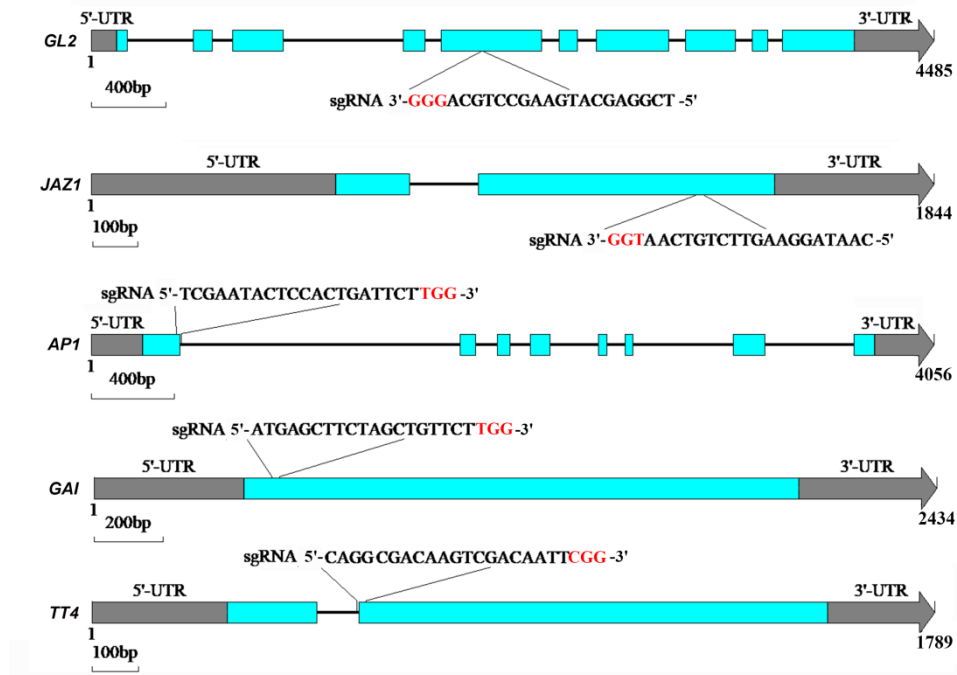

**Supplemental Figure S1** The target sites of genes for monogenic mutation used in this study. The structures of *GL2*, *AP1*, *TT4*, *JAZ1*, and *GAI* are represented by exons (light blue bars), introns (black lines), and untranslated regions (UTRs) (gray bars). The sgRNA target sites are indicated and the protospacer adjacent motif (PAM) sites are highlighted in red.

*gl2* #1 Allele1: GCAGCTCTTGG-----CTTCATGC (-23 bp)  
Allele2: GCAGCTCTTGG-----CTTCATGC (-23 bp)  
WT: GCAGCTCTTGGACGCACTCCCTATCCCCTGCAGGCTTCATGC

*gl2* #6 Allele1: CGCACTCCCTATCCCCTGC-----TCCGACGATCA (-11 bp)  
Allele2: CGCACTCCCTATCCCCTGC**A**AGGCTTCATGCTCCGACGATCA (+1 bp)  
WT: CGCACTCCCTATCCCCTGC-AGGCTTCATGCTCCGACGATCA

*gl2* #11 Allele1: CGCACTCCCTATCCCCTGCA-GCTTCATGCTCCGACGATCAAG (-1 bp)  
Allele2: CGCACTCCCTATCCCCTGCA-----TGCTCCGACGATCAAG (-7 bp)  
WT: CGCACTCCCTATCCCCTGCAGGCTTCATGCTCCGACGATCAAG

*gl2* #21 Allele1: CGCACTCCCTATCCCCTGC-----TGCTCCGACGATCAAG (-8 bp)  
Allele2: CGCACTCCCTATCCCCTGC-----TGCTCCGACGATCAAG (-8 bp)  
WT: CGCACTCCCTATCCCCTGCAGGCTTCATGCTCCGACGATCAAG

**Supplemental Figure S2** DNA sequences of the *gl2* mutants. The reference sequence of WT is shown on the bottom. The indels in mutant alleles are depicted by a red dash (deletion) or red letter (insertion).

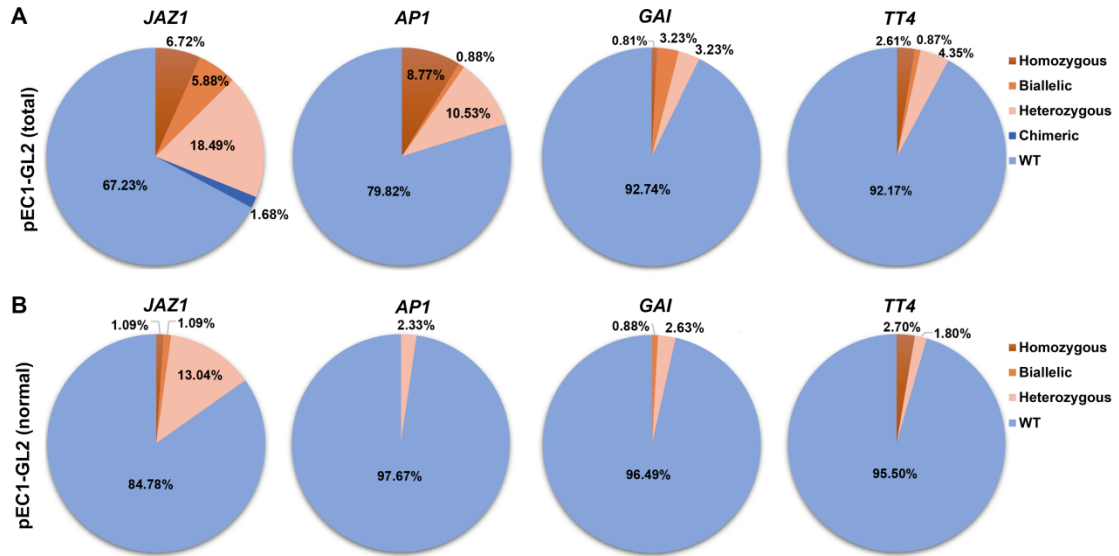

**Supplemental Figure S3** Analyses of the frequencies of mutations for all transgenic T1 plants (total) and those with normal trichomes (normal) group obtained using the pEC1-GL2 vector. A, Percentages of WT and different types of mutation at four target sites among all T1 plants obtained using pEC1-GL2 vector. B, Percentages of WT and different types of mutation at four target sites among T1 plants with normal trichomes obtained using the pEC1-GL2 vector.

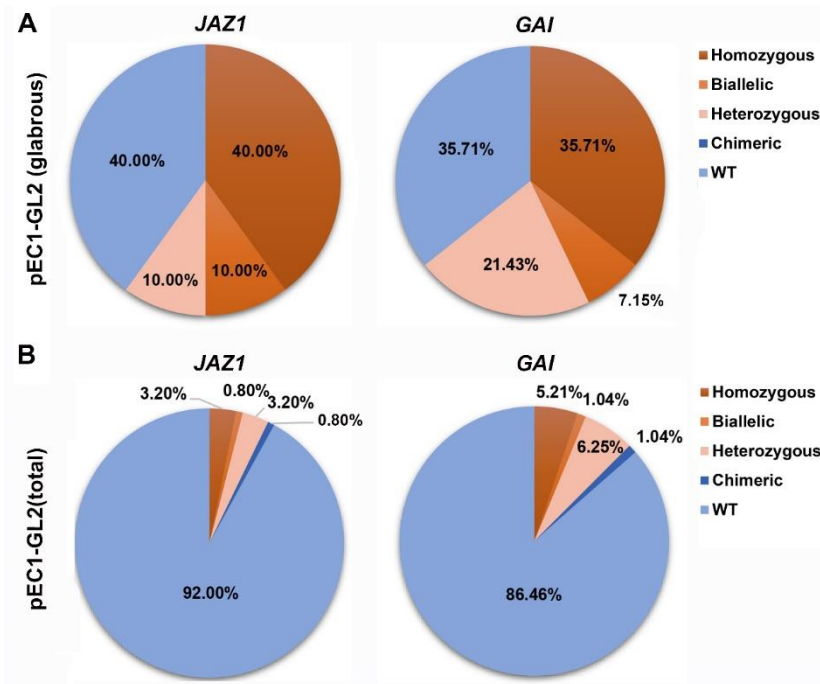

**Supplemental Figure S4** Analyses of the frequencies of *JAZ1* and *GAI* mutations for all transgenic T1 plants (total) and glabrous (glabrous) group obtained using the pEC1-GL2 vector. A, Percentages of WT and different types of mutation at *JAZ1* and *GAI* target sites among glabrous T1 plants obtained using pEC1-GL2 vector. B, Percentages of WT and different types of mutation at *JAZ1* and *GAI* target sites among all T1 plants obtained using the pEC1-GL2 vector.

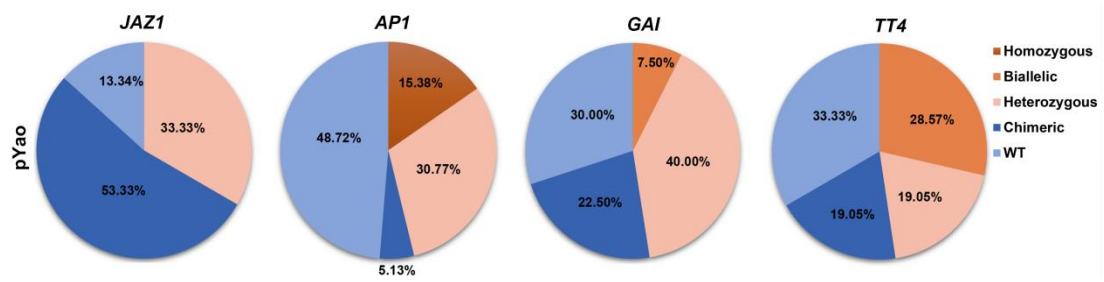

**Supplemental Figure S5** Analyses of the frequencies of mutation in T1 plants obtained using the pYao vector. Percentages of WT and different types of mutation are shown for four target sites.

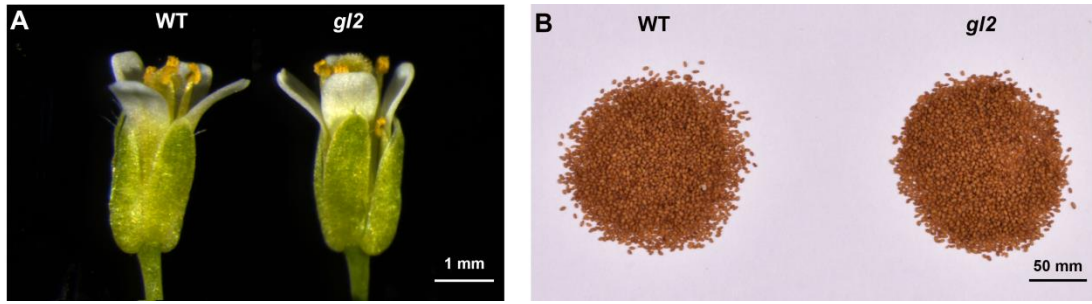

**Supplemental Figure S6** Mutation of *GL2* does not affect flower development or seed color. A, Representative flowers from WT and the *gl2* mutant. B, Seeds of WT and the *gl2* mutant.

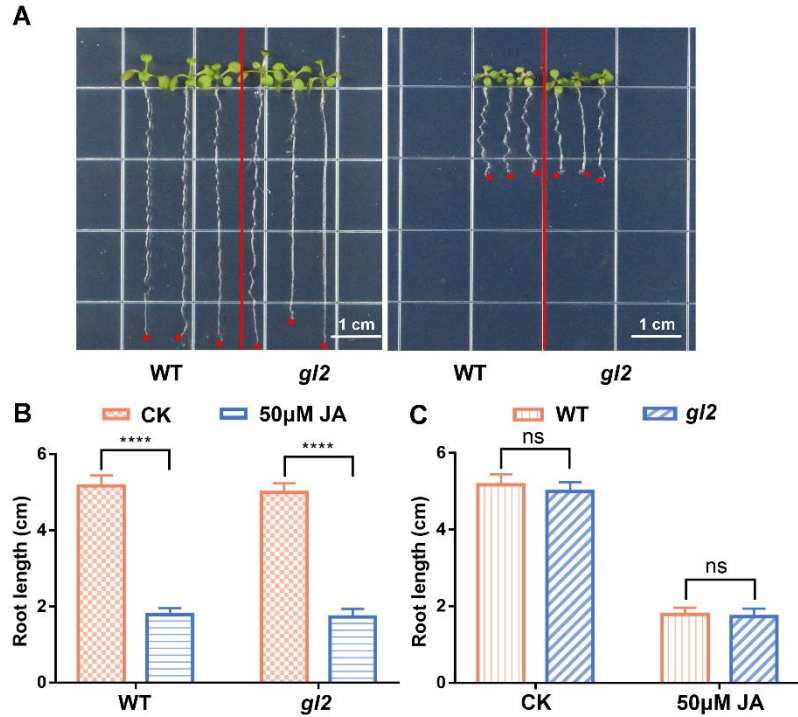

**Supplemental Figure S7** Mutation of *GL2* does not affect plant response to JA. A, Representative T2 seedlings of WT and the *gl2* mutant grown on 1/2 MS plates with or without 50 μM JA. B, Analyses of primary root length to compare the JA response of WT and the *gl2* mutant. C, Analyses of primary root length to compare the growth of WT and the *gl2* mutant on 1/2 MS plates with or without 50 μM JA. Data are shown as mean ± SD (n = 15). ns: no significant difference; \*\*\*\*: P<0.0001 determined by Student's *t*-test.





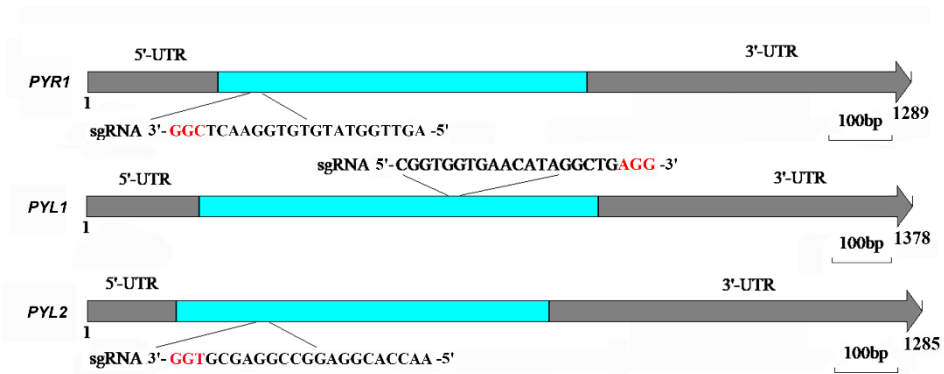

**Supplemental Figure S9** The target sites of genes for polygenic mutation used in this study. The structures of *PYR1*, *PYL1*, and *PYL2* are represented by exons (light blue bars), and untranslated regions (UTRs) (gray bars). The sgRNA target sites are indicated and the protospacer adjacent motif (PAM) sites are highlighted in red.

■ Homozygous 
 ■ Biallelic 
 ■ Heterozygous 
 ■ Chimeric 
 ■ WT

| Line \ Target | #1           | #2           | #3        | #4           | #5       | #6           | #7           | #8       | #9           | #10      | #11       | #12      | #13      | #14          | #15      | #16          | #17          | #18      | #19      | #20      |
|---------------|--------------|--------------|-----------|--------------|----------|--------------|--------------|----------|--------------|----------|-----------|----------|----------|--------------|----------|--------------|--------------|----------|----------|----------|
| <i>PYR1</i>   | Chimeric     | Heterozygous | Chimeric  | Biallelic    | Chimeric | Heterozygous | Chimeric     | Chimeric | Biallelic    | Chimeric | Biallelic | Chimeric | Chimeric | Chimeric     | Chimeric | Heterozygous | Biallelic    | Chimeric | Chimeric | Chimeric |
| <i>PYL1</i>   | Heterozygous | Heterozygous | Biallelic | Biallelic    | Chimeric | Chimeric     | Homozygous   | Chimeric | Heterozygous | Chimeric | Chimeric  | Chimeric | Chimeric | Heterozygous | Chimeric | Chimeric     | Biallelic    | Chimeric | Chimeric | Chimeric |
| <i>PYL2</i>   | Chimeric     | Chimeric     | Chimeric  | Heterozygous | Chimeric | Chimeric     | Heterozygous | Chimeric | Chimeric     | Chimeric | Chimeric  | Chimeric | Chimeric | Chimeric     | Chimeric | Chimeric     | Heterozygous | Chimeric | Chimeric | Chimeric |

**Supplemental Figure S10** Mutation types at each target sites of multiplex edited T1 plants with normal trichomes. The types of mutation at *PYR1*, *PYL1* and *PYL2* loci in individual T1 plants with normal trichomes were analyzed.

**Supplemental Table S1** Numbers of all transgenic T1 plants and glabrous T1 plants

for each target gene obtained using the pEC-GL2 vector.

| <b>Target</b> | <b>T1 (total)</b> | <b>T1 (glabrous)</b> | <b>glabrous /total</b> |
|---------------|-------------------|----------------------|------------------------|
| <i>JAZ1</i>   | 119               | 27                   | 22.69%                 |
| <i>API</i>    | 114               | 28                   | 24.56%                 |
| <i>GAI</i>    | 124               | 10                   | 8.06%                  |
| <i>TT4</i>    | 115               | 4                    | 3.48%                  |

**Supplemental Table S2** Mutation frequencies of four target genes using different CRISPR-Cas9 systems.

|                            | <i>JAZ1</i> | <i>API</i> | <i>GAI</i> | <i>TT4</i> |
|----------------------------|-------------|------------|------------|------------|
| <b>pYao</b>                | 86.66%      | 51.28%     | 70.00%     | 66.67%     |
| <b>pEC1</b>                | 35.91%      | 10.00%     | 14.64%     | 22.50%     |
| <b>pEC1-GL2</b>            | 32.77%      | 20.18%     | 7.26%      | 7.83%      |
| <b>pEC1-GL2 (glabrous)</b> | 92.59%      | 75.00%     | 50.00%     | 100.00%    |

**Supplemental Table S3 Primers used in this study**

| <b>Primer name</b> | <b>Primer sequence</b>                                                |
|--------------------|-----------------------------------------------------------------------|
| GL2-sgRNA-F        | ATTGTCGGAGCATGAAGCCTGCA                                               |
| GL2-sgRNA-R        | AAACTGCAGGCTTCATGCTCCGA                                               |
| AP1-sgRNA194-F     | ATTGTCGAATACTCCACTGATTCT                                              |
| AP1-sgRNA194-R     | AAACAGAATCAGTGGAGTATTCGA                                              |
| JAZ1-sgRNA1-F      | ATTGCAATAGGAAGTCTGTCAA                                                |
| JAZ1-sgRNA1-R      | AAACTTGACAGAACTTCCTATTG                                               |
| TT4-sgRNA296-F     | ATTGCAGGCGACAAGTCGACAATT                                              |
| TT4-sgRNA296-R     | AAACAATTGTCGACTGTGCGCCTG                                              |
| GAI-sgRNA1-F       | ATTGATGAGCTTCTAGCTGTCT                                                |
| GAI-sgRNA1-R       | AAACAGAACAGCTAGAAGCTCAT                                               |
| GL2-2Tar-F         | TAGAGTCGAAGTAGTGATTGTGAGACCTGAATTCAGGTCTCAGTTTTAGAGCTAGAAATAG<br>C    |
| GL2-2Tar-R         | GCTATTTCTAGCTCTAAAACCTGCAGGCTTCATGCTCCGACAATCTCTTAGTCGACTCTA          |
| YAOp-F             | CAATACCATGGTTATACTAGTGATGGGAAATTCATGAAAAC                             |
| YAOp-R             | GGTCTTGTAATCCATCTAGATTCTTCTCTCTCACTCCCTC                              |
| 4DT-1F             | TAGAGTCGAAGTAGTGATTGAGTTGGTATGTGTGGAAGTGTGTTAGAGCTAGAAATAG            |
| 4DT-1R             | CAGCCTATGTTACCACCGAATCTCTTAGTCGACTCTA                                 |
| 4DT-2F             | GGTGGTGAACATAGGCTGGTTTTAGAGCTAGAAATAGC                                |
| 4DT-2R             | GCTATTTCTAGCTCTAAAACGGTACCCGCTCCGGCCTCCGTGGTTCAATCACTACTTCGTCTC<br>TA |
| 4DT-3F             | ACCACGGAGGCCGGAGCGGTTTTAGAGCTAGAAATAGC                                |
| 4DT-3R             | GCTATTTCTAGCTCTAAAACCTGCAGGCTTCATGCTCCGACAATCACTACTTCGACTCTA          |
| GL2-IF             | GTTCCAAAACCGCCGCA                                                     |
| GL2-IR             | TAAACACAATCCCCGCATCTC                                                 |
| AP1-IF             | TCTCCATAAATAAAGATCCCGAGAC                                             |
| AP1-IR             | CTGGCTAATCAAAAAATCAAAAA                                               |
| JAZ1-IF            | TTGACTATATTCTACGCCGGGC                                                |
| JAZ1-IR            | GTAACAAAATGAAAACAAAACACACCT                                           |
| TT4-IF             | ATAATGGTGATGGCTGGTGCT                                                 |
| TT4-IR             | TCAAGGTGGGTGTCAGAGGG                                                  |
| GAI-IF             | CCCCATCACGAGCCTTTTTAT                                                 |
| GAI-IR             | CGTCGCTGTAGTGGTTCCAC                                                  |
| PYR1-IF            | CATGTTACCTTCATCTTCCT                                                  |
| PYR1-IR            | ATCATCTCCGAGTTACCTTCC                                                 |
| PYL1-IF            | CCAACTCTCCCAATCAATCGCC                                                |
| PYL1-IR            | CCCCAAATTCATCATTACCTAACC                                              |
| PYL2-IF            | ACAAACCCCAACCTCAA                                                     |
| PYL2-IR            | TCGACGAACTCAAGCCGCTC                                                  |

**Supplemental Data Set S1** Sequences for plasmids used in this paper.

**pEC1-GL2 plasmid:**

GTTTACCCGCCAATATATCCTGTCAAACACTGATAGTTTAACTGAAGGCGGGAAACGA  
CAATCTGATCCAAGCTCAAGCTGCTCTAGCATTCCGCCATTCAGGCTGCGCAACTGTTGG  
GAAGGGCGATCGGTGCGGGCCTCTTCGCTATTACGCCAGCTGGCGAAAGGGGGATGTG  
CTGCAAGGCGATTAAGTTGGGTAACGCCAGGGTTTTCCAGTCACGACGTTGTAAAAC  
GACGGCCAGTGCCAAGCTTCGACTTGCCTTCCGCACAATACATCATTCTTCTTAGCTT  
TTTTTCTTCTTCTTCGTTTCATACAGTTTTTTTTTTGTTTATCAGCTTACATTTTTCTTGAACC  
GTAGCTTTTCGTTTTTCTTTTTTAACTTTCCATTCGGAGTTTTTGTATCTTGTTTCATAGT  
TTGTCCCAGGATTAGAATGATTAGGCATCGAACCTTCAAGAATTTGATTGAATAAAACA  
TCTTCATTCTTAAGATATGAAGATAATCTTCAAAGGCCCTGGGAATCTGAAAGAAGA  
GAAGCAGGCCCATTTATATGGGAAAGAACAATAGTATTTCTTATATAGGCCCATTTAAGT  
TGAAAACAATCTTCAAAGTCCCACATCGCTTAGATAAGAAAACGAAGCTGAGTTTAT  
ATACAGCTAGAGTCGAAGTAGTGATTGTGAGACCTGAATTCAGGTCTCAGTTTTAGAG  
CTAGAAATAGCAAGTTAAAATAAGGCTAGTCCGTTATCAACTTGAAAAAGTGGCACCG  
AGTCGGTGCTTTTTTTTTGCAAAATTTCCAGATCGATTTCTTCTTCTCTGTTCTTCGGC  
GTTCAATTTCTGGGGTTTTCTTCTCGTTTTCTGTAACTGAAACCTAAAATTTGACCTAAA  
AAAAATCTCAAATAATATGATTCAGTGGTTTTGTACTTTTCAGTTAGTTGAGTTTTGCAG  
TTCCGATGAGATAAACCAATATTAATCCAACTACTGCAGCCTGACAGACAAATGAGGA  
TGCAAACAATTTTAAAGTTTATCTAACGCTAGCTGTTTTGTTTCTTCTCTCTGGTGCACC  
AACGACGGCGTTTTCTCAATCATAAAGAGGCTTGTTTTACTTAAAGGCCAATAATGTTGA  
TGGATCGAAAGAAGAGGGCTTTTAATAAACGAGCCCGTTAAGCTGTAAACGATGTCA  
AAAACATCCCACATCGTTCAGTTGAAAATAGAAGCTCTGTTTATATATTGGTAGAGTCG  
ACTAAGAGATTGTCGGAGCATGAAGCCTGCAGTTTTAGAGCTAGAAATAGCAAGTTAA  
AATAAGGCTAGTCCGTTATCAACTTGAAAAAGTGGCACCGAGTCGGTGCTTTTTTTTTGC  
AAAATTTCCAGATCGATTTCTTCTTCTCTGTTCTTTCGGCGTTCAATTTCTGGGGTTTT  
CTTCTCGTTTTCTGTAACTGAAACCTAAAATTTGACCTAAAAAAAATCTCAAATAATATG  
ATTCAGTGGTTTTGTACTTTTCAGTTAGTTGAGTTTTGCAGTTCCGATGAGATAAACCAA  
TACCATGGTTATACTAGTGAATAAAAGCATTGCGTTTTGGTTTATCATTGCGTTTATACAA  
GGACAGAGATCCACTGAGCTGGAATAGCTTAAAACCATTATCAGAACAAAATAAACCA  
TTTTTTGTTAAGAATCAGAGCATAGTAAACAACAGAAACAACCTAAGAGAGGTAACCTT  
GTCCAAGAAGATAGCTAATTATATCTATTTTATAAAAGTTATCATAGTTTGTAAGTCACAA  
AAGATGCAAATAACAGAGAACTAGGAGACTTGAGAATATACATTCTTGTATATTTGTAT  
TCGAGATTGTGAAAATTTGACCATAAGTTTAAATTCTTAAAAAGATATATCTGATCTAGG  
TGATGGTTATAGACTGTAATTTTACCACATGTTAATGATGGATAGTGACACACATGACA  
CATCGACAACACTATAGCATCTTATTTAGATTACAACATGAAATTTTTCTGTAATACATGT  
CTTTGTACATAATTTAAAAGTAATTCCTAAGAAATATATTTATAACAAGGAGTTTAAAGAA  
AACATAGCATAAAGTTCAATGAGTAGTAAAAACCATATACAGTATATAGCATAAAGTTCA  
ATGAGTTTATTACAAAAGCATTGGTTCACTTTCTGTAAACACGACGTTAAACCTTCGTCT  
CCAATAGGAGCGCTACTGATTCAACATGCCAATATATACTAAATACGTTTCTACAGTCAA  
ATGCTTTAACGTTTCATGATTAAGTGACTATTTACCGTCAATCCTTTCCCATTCCTCCCAC  
TAATCCAACCTTTTTAATTACTCTTAAATCACCCTAAGCTAGTAACGCCTATCATGAATT

AGCTCTACTAAATCTAGCAACCTTTCAAATTTGCAGTATTGCAGGTGTCTCTGTGTCTTT  
AAAATAGTTGCCTTATGATTTCTTCGGTTTCAAGATGATCAAATAGTTATAGATTTTCATGC  
TCACACATGCTCATTAGATGTGTACATACTTACTTACCCAAATCTATTTTCTCGCAAAG  
ATTTTGATGGTAAAGCTGATTTGGTTCTATTGAACTAAATCAAACGAGTTTCAGACTGA  
GTGATTCTAATCCGGCCCATTAGCCCCTAAACAGACCCACTAATTACGCAGCTTTTAATA  
GAGTAATTACACCTAGTTTACCCACTAAACCACTAAGCACTAATTATCTCACAATCTAAT  
GAGCTTCCCTCGTAATTACTTGGGCTTTCACTCTACCATTTATTTGTAACAGTCAAGTCT  
CTACTGTCTCTATATAAACTCTCTAAAGTTAACACACAATTCTCATCACAACAAATCAA  
CCAAAGCAACTTCTACTCTTTCTTTCTTTTCGACCTTATCAATCTGTTGAGAAATCTAGATG  
GATTACAAGGACCACGACGGGGATTACAAGGACCACGACATTGATTACAAGGATGATG  
ATGACAAGATGGCTCCGAAGAAGAAGAGGAAGGTTGGCATCCACGGGGTGCCAGCTG  
CTGACAAGAAGTACTCGATCGGCCTCGATATTGGGACTAACTCTGTTGGCTGGGCCGT  
GATCACCGACGAGTACAAGGTGCCCTCAAAGAAGTTCAAGGTCTGGGCAACACCGA  
TCGGCATTCCATCAAGAAGAATCTCATTGGCGCTCTCCTGTTTCGACAGCGGCGAGACG  
GCTGAGGCTACGCGGCTCAAGCGCACCCGCCGAGGCGGTACACGCGCAGGAAGAAT  
CGCATCTGCTACCTGCAGGAGATTTTCTCCAACGAGATGGCGAAGGTTGACGATTCTTT  
CTTCCACAGGCTGGAGGAGTCATTCTCGTGGAGGAGGATAAGAAGCACGAGCGGCA  
TCCAATCTTCGGCAACATTGTGACGAGGTTGCCTACCACGAGAAGTACCCTACGATCT  
ACCATCTGCGGAAGAAGCTCGTGGACTCCACAGATAAGGCGGACCTCCGCCTGATCTA  
CCTCGCTCTGGCCACATGATTAAGTTCAGGGGCCATTTCTGATCGAGGGGGATCTCA  
ACCCGGACAATAGCGATGTTGACAAGCTGTTTCATCCAGCTCGTGCAGACGTACAACCA  
GCTCTTCGAGGAGAACCCCATTAATGCGTCAGGCGTCGACGCGAAGGCTATCCTGTCC  
GCTAGGCTCTCGAAGTCTCGGGCCTCGAGAACCTGATCGCCCAGCTGCCGGGCGAG  
AAGAAGAACGGCCTGTTTCGGGAATCTCATTGCGCTCAGCCTGGGGCTCACGCCAACT  
TCAAGTCGAATTTGATCTCGCTGAGGACGCCAAGCTGCAGCTCTCCAAGGACACATA  
CGACGATGACCTGGATAACCTCCTGGCCAGATCGGGCGATCAGTACGCGGACCTGTTT  
CTCGCTGCCAAGAATCTGTGCGGACGCCATCCTCCTGTCTGATATTCTCAGGGTGAACAC  
CGAGATTACGAAGGCTCCGCTCTCAGCCTCCATGATCAAGCGCTACGACGAGCACCAT  
CAGGATCTGACCCTCCTGAAGGCGCTGGTCAGGCAGCAGCTCCCCGAGAAGTACAAG  
GAGATCTTCTTCGATCAGTCGAAGAACGGCTACGCTGGGTACATTGACGGCGGGGCT  
CTCAGGAGGAGTTCTACAAGTTCATCAAGCCGATTCTGGAGAAGATGGACGGCACGG  
AGGAGCTGCTGGTGAAGCTCAATCGCGAGGACCTCCTGAGGAAGCAGCGGACATTCTG  
ATAACGGCAGCATCCACACCAGATTCATCTCGGGGAGCTGCACGCTATCCTGAGGAG  
GCAGGAGGACTTCTACCCTTTCTCAAGGATAACCGCGAGAAGATCGAGAAGATTCTG  
ACTTTCAGGATCCCGTACTACGTGGCCCACTCGCTAGGGGCAACTCCCGCTTCGCTTG  
GATGACCCGCAAGTCAGAGGAGACGATCACGCCGTGGAACCTTCGAGGAGGTGGTTCGA  
CAAGGGCGCTAGCGCTCAGTCGTTTCATCGAGAGGATGACGAATTCGACAAGAACCTG  
CCAAATGAGAAGGTGCTCCCTAAGCACTCGCTCCTGTACGAGTACTTCACAGTCTACA  
ACGAGCTGACTAAGGTGAAGTATGTGACCGAGGGCATGAGGAAGCCGGCTTTCCTGTC  
TGGGGAGCAGAAGAAGGCCATCGTGGACCTCCTGTTCAAGACCAACCGGAAGGTAC  
GGTTAAGCAGCTCAAGGAGGACTACTTCAAGAAGATTGAGTGCTTCGATTTCGGTCGAG  
ATCTCTGGCGTTGAGGACCGCTTCAACGCCTCCCTGGGGACCTACCACGATCTCCTGA  
AGATCATTAAGGATAAGGACTTCTGACAACGAGGAGAATGAGGATATCCTCGAGGA  
CATTGTCTGACACTACTCTGTTTCGAGGACCGGGAGATGATCGAGGAGCGCCTGAAG



ACTTACGCCCATCTCTTCGATGACAAGGTCATGAAGCAGCTCAAGAGGAGGAGGTACA  
CCGGCTGGGGGAGGCTGAGCAGGAAGCTCATCAACGGCATTTCGGGACAAGCAGTCCG  
GGAAGACGATCCTCGACTTCTGAAGAGCGATGGCTTCGCGAACCGCAATTTTCATGCA  
GCTGATTCACGATGACAGCCTCACATTCAAGGAGGATATCCAGAAGGCTCAGGTGAGC  
GGCCAGGGGGACTCGCTGCACGAGCATATCGCGAACCTCGCTGGCTCGCCAGCTATCA  
AGAAGGGGATTCTGCAGACCGTGAAGGTTGTGGACGAGCTGGTGAAGGTCATGGGCA  
GGCACAAGCCTGAGAACATCGTCATTGAGATGGCCCCGGGAGAATCAGACCACGCAGA  
AGGGCCAGAAGAACTCACGCGAGAGGATGAAGAGGATCGAGGAGGGCATTAAAGGAG  
CTGGGGTCCCAGATCCTCAAGGAGCACCCGGTGGAGAACACGCAGCTGCAGAATGAG  
AAGCTCTACCTGTACTACCTCCAGAATGGCCGCGATATGTATGTGGACCAGGAGCTGGA  
TATTAACAGGCTCAGCGATTACGACGTCGATCATATCGTTCCACAGTCATTCTGAAGG  
ATGACTCCATTGACAACAAGGTCCTCACCAGGTCGGACAAGAACCGGGGCAAGTCTG  
ATAATGTTCCCTCAGAGGAGGTGCTTAAAGAAGATGAAGAACTACTGGCGCCAGCTCCT  
GAATGCCAAGCTGATCACGCAGCGGAAGTTCGATAACCTCACAAAGGCTGAGAGGGG  
CGGGCTCTCTGAGCTGGACAAGGCGGGCTTCATCAAGAGGCAGCTGGTTCGAGACACG  
GCAGATCACTAAGCACGTTGCGCAGATTCTCGACTCACGGATGAACACTAAGTACGAT  
GAGAATGACAAGCTGATCCGCGAGGTGAAGGTCATCACCTGAAGTCAAAGCTCGTC  
TCCGACTTCAGGAAGGATTTCCAGTTCTACAAGGTTTCGGGAGATCAACAATTACCACC  
ATGCCCATGACGCGTACCTGAACGCGGTGGTCGGCACAGCTCTGATCAAGAAGTACCC  
AAAGCTCGAGAGCGAGTTCGTGTACGGGGACTACAAGGTTTACGATGTGAGGAAGAT  
GATCGCCAAGTCGGAGCAGGAGATTGGCAAGGCTACCGCCAAGTACTTCTTCTACTCT  
AACATTATGAATTTCTTCAAGACAGAGATCACTCTGGCCAATGGCGAGATCCGGAAGC  
GCCCCCTCATCGAGACGAACGGCGAGACGGGGGAGATCGTGTGGGACAAGGGCAGG  
GATTTTCGCGACCGTCAGGAAGGTTCTCTCCATGCCACAAGTGAATATCGTCAAGAAGA  
CAGAGGTCCAGACTGGCGGGTCTCTAAGGAGTCAATTCTGCCTAAGCGGAACAGCG  
ACAAGCTCATCGCCCGCAAGAAGGACTGGGATCCGAAGAAGTACGGCGGGTTCGACA  
GCCCCACTGTGGCCTACTCGGTCTGTTGTGGCGAAGGTTGAGAAGGGCAAGTCCA  
AGAAGCTCAAGAGCGTGAAGGAGCTGCTGGGGATCACGATTATGGAGCGCTCCAGCT  
TCGAGAAGAACCCGATCGATTTCTGGAGGCGAAGGGCTACAAGGAGGTGAAGAAGG  
ACCTGATCATTAAAGTCCCCAAGTACTACTCTTCGAGCTGGAGAACGGCAGGAAGCG  
GATGCTGGCTTCCGCTGGCGAGCTGCAGAAGGGGAACGAGCTGGCTCTGCCGTCCAA  
GTATGTGAACCTTCTTACCTGGCCTCCCACTACGAGAAGCTCAAGGGCAGCCCCGAG  
GACAACGAGCAGAAGCAGCTGTTTCGTCGAGCAGCACAAGCATTACCTCGACGAGATC  
ATTGAGCAGATTTCCGAGTTCTCCAAGCGCGTGATCCTGGCCGACGCGAATCTGGATA  
AGGTCTCTCCGCGTACAACAAGCACCGCGACAAGCCAATCAGGGAGCAGGCTGAGA  
ATATCATTATCTTTCACCTGACGAACCTCGGCGCCCCCTGCTGCTTTCAAGTACTTCG  
ACACA ACTATCGATCGAAGAGGTACACAAGCACTAAGGAGGTCTGACGCGACCC  
TCATCCACCAGTCGATTACCGGCCTCTACGAGACGCGCATCGACCTGTCTCAGCTCGG  
GGGCGACAAGCGGCCAGCGGCGACGAAGAAGGCGGGGCAGGCGAAGAAGAAGAAG  
TGAGCTCAGAGCTTTCGTTTCGATATCGGTTTCGACAACGTTTCGTCAGTTCAATGCA  
TCAGTTTCATTGCGCACACACCAGAATCCTACTGAGTTTGAGTATTATGGCATTGGGAA  
AACTGTTTTTCTTGTACCATTTGTTGTGCTTGTAATTTACTGTGTTTTTTATTTCGTTTTT  
GCTATCGAACTGTGAAATGGAAATGGATGGAGAAGAGTTAATGAATGATATGGTCTTTT  
TGTTCAATCTCAAATTAATATTATTTGTTTTTCTTATTTGTTGTGTGTTGAATTTGAAA

TTATAAGAGATATGCAAACATTTTGTGTTTTGAGTAAAAATGTGTCAAATCGTGGCCTCTAA  
TGACCGAAGTTAATATGAGGAGTAAAACACTTGTAGTTGTACCATTATGCTTATTCACTA  
GGCAACAAATATATTTTCAGACCTAGAAAAGCTGCAAATGTTACTGAATACAAGTATGT  
CCTCTTGTGTTTTAGACATTTATGAACTTTCCTTTATGTAATTTTCCAGAATCCTTGTGAG  
ATTCTAATCATTGCTTTATAATTATAGTTATACTCATGGATTGTAGTTGAGTATGAAAATA  
TTTTTTAATGCATTTTATGACTTGCCAATTGATTGACAACGAATTCGTAATCATGTCATAG  
CTGTTTCCTGTGTGAAATTGTTATCCGCTCACAATTCCACACAACATACGAGCCGGAAG  
CATAAAGTGTAAGCCTGGGGTGCCTAATGAGTGAGCTAACTCACATTAATTGCGTTGC  
GCTCACTGCCCCGTTTTCCAGTCGGGAAACCTGTCGTGCCAGCTGCATTAATGAATCGG  
CCAACGCGCGGGGAGAGGCGGTTTGCGTATTGGCTAGAGCAGCTTGCCAACATGGTG  
GAGCACGACACTCTCGTCTACTCCAAGAATATCAAAGATACAGTCTCAGAAGACCAAAA  
GGGCTATTGAGACTTTTCAACAAAGGGTAATATCGGGAAACCTCCTCGGATTCCATTGC  
CCAGCTATCTGTCACTTCATCAAAGGACAGTAGAAAAGGAAGGTGGCACCTACAAAT  
GCCATCATTGCGATAAAGGAAAGGCTATCGTTCAAGATGCCTCTGCCGACAGTGGTCC  
CAAAGATGGACCCCCACCCACGAGGAGCATCGTGGA AAAAGAAGACGTTCCAACCAC  
GTCTTCAAAGCAAGTGGATTGATGTGAACATGGTGGAGCACGACACTCTCGTCTACTC  
CAAGAATATCAAAGATACAGTCTCAGAAGACCAAAGGGCTATTGAGACTTTTCAACAA  
AGGGTAATATCGGGAAACCTCCTCGGATTCCATTGCCAGCTATCTGTCACTTCATCAA  
AAGGACAGTAGAAAAGGAAGGTGGCACCTACAAATGCCATCATTGCGATAAAGGAAA  
GGCTATCGTTCAAGATGCCTCTGCCGACAGTGGTCCCAAAGATGGACCCCCACCCACG  
AGGAGCATCGTGGAAAAAGAAGACGTTCCAACCACGTCTTCAAAGCAAGTGGATTGA  
TGTGATATCTCCACTGACGTAAGGGATGACGCACAATCCCACTATCCTTCGCAAGACCC  
TTCTCTATATAAGGAAGTTCATTTCAATTTGGAGAGGACACGCTGAAATCACCAGTCTC  
TCTCTACAAATCTATCTCTCTCGAGCTTTTCGAGATCCGGGGGGCAATGAGATATGAAA  
AAGCCTGAACTACCGCGACGTCTGTGAGAAAGTTTCTGATCGAAAAGTTCGACAGC  
GTCTCCGACCTGATGCAGCTCTCGGAGGGCGAAGAATCTCGTGCTTTCAGCTTCGATGT  
AGGAGGGCGTGGATATGTCCTGCGGGTAAATAGCTGCGCCGATGGTTTCTACAAAGAT  
CGTTATGTTTATCGGCACTTTGCATCGGCCGCGCTCCCGATTCCGGAAGTGCTTGACAT  
TGGGGAGTTTAGCGAGAGCCTGACCTATTGCATCTCCCGCCGTTACAGGGTGTACAG  
TTGCAAGACCTGCCTGAAACCGAACTGCCCGCTGTTCTACAACCGGTGCGGGAGGCTA  
TGGATGCGATCGTGC GGCCGATCTTAGCCAGACGAGCGGGTTCGGCCATTTCGGACC  
GCAAGGAATCGGTCAATACACTACATGGCGTGATTTCAATATGCGCGATTGCTGATCCCC  
ATGTGTATCACTGGCAAACCTGTGATGGACGACACCGTCAGTGCCTCCGTCGCGCAGGC  
TCTCGATGAGCTGATGCTTTGGGCCGAGGACTGCCCCGAAGTCCGGCACCTCGTGCAC  
GCGGATTCGGCTCCAACAATGTCCTGACGGACAATGGCCGCATAACAGCGGTCATTG  
ACTGGAGCGAGGCGATGTTTCGGGGATTCCCAATACGAGGTGCGCAACATCTTCTTCTG  
GAGGCCGTGGTTGGCTTGATGGAGCAGCAGACGCGCTACTTCGAGCGGAGGCATCCG  
GAGCTTGCAAGGATCGCCACGACTCCGGGGCGTATATGCTCCGCATTGGTCTTGACCAACT  
CTATCAGAGCTTGGTTGACGGCAATTTTCGATGATGCAGCTTGGGCGCAGGGTTCGATGC  
GACGCAATCGTCCGATCCGGAGCCGGGACTGTGCGGGCGTACACAAATCGCCCGCAGA  
AGCGCGGCCGTCTGGACCGATGGCTGTGTAGAAAGTACTCGCCGATAGTGGAAACCGAC  
GCCCCAGCACTCGTCCGAGGGCAAAGAAATAGAGTAGATGCCGACCGGGATCTGTGCA  
TCGACAAGCTCGAGTTTCTCATAATAATGTGTGAGTAGTTCCAGATAAGGGAAATTAG  
GGTTCCTATAGGGTTTCGCTCATGTGTTGAGCATATAAGAAACCTTAGTATGTATTTGT

ATTTGTAAAATACTTCTATCAATAAAAATTTCTAATTCCTAAAACCAAATCCAGTACTAA  
AATCCAGATCCCCGAATTAATTCGGCGTTAATTCAGTACATTA AAAACGTCCGCAATG  
TGTTATTAAGTTGTCTAAGCGTCAATTTGTTTACACCACAATATATCCTGCCACCAGCCA  
GCCAACAGCTCCCCGACCGGCAGCTCGGCACAAAATCACC ACTCGATACAGGCAGCC  
CATCAGTCCGGGACGGCGTCAGCGGGAGAGCCGTTGTAAGGCGGCAGACTTTGCTCAT  
GTTACCGATGCTATTCGGAAGAACGGCAACTAAGCTGCCGGGTTTGAAACACGGATGA  
TCTCGCGGAGGGTAGCATGTTGATTGTAACGATGACAGAGCGTTGCTGCCTGTGATCA  
CCGCGGTTTCAA AATCGGCTCCGTCGATACTATGTTATACGCCAACTTTGAAAACA ACT  
TTGAAAAAGCTGTTTTCTGGTATTTAAGGTTTTAGAATGCAAGGAACAGTGAATTGGA  
GTTTCGTCTTGTTATAATTAGCTTCTTGGGGTATCTTTAAATACTGTAGAAAAGAGGAAGG  
AAATAATAAATGGCTAAAATGAGAATATCACCGGAATTGAAAAA ACTGATCGAAAAATA  
CCGCTGCGTAAAAGATACGGAAGGAATGTCTCCTGCTAAGGTATATAAGCTGGTGGGA  
GAAAATGAAAACCTATATTTAAAATGACGGACAGCCGGTATAAAGGGACCACCTATG  
ATGTGGAACGGGAAAAGGACATGATGCTATGGCTGGAAGGAAAGCTGCCTGTTCCAA  
AGGTCTGCACTTTGAACGGCATGATGGCTGGAGCAATCTGCTCATGAGTGAGGCCGA  
TGGCGTCTTTGCTCGGAAGAGTATGAAGATGAACAAAGCCCTGAAAAGATTATCGAG  
CTGTATGCGGAGTGCATCAGGCTCTTTC ACTCCATCGACATATCGGATTGTCCCTATACG  
AATAGCTTAGACAGCCGCTTAGCCGAATTGGATTACTTACTGAATAACGATCTGGCCGA  
TGTGGATTGCGAAA ACTGGGAAGAAGACACTCCATTTAAAGATCCGCGCGAGCTGTAT  
GATTTTTTAAAGACGGAAAAGCCCGAAGAGGAACTTGTCTTTTCCCACGGCGACCTGG  
GAGACAGCAACATCTTTGTGAAAGATGGCAAAGTAAGTGGCTTTATTGATCTTGGGAG  
AAGCGGCAGGGCGGACAAGTGGTATGACATTGCCTTCTGCGTCCGGTCGATCAGGGAG  
GATATCGGGGAAGAACAGTATGTCGAGCTATTTTTTGACTTACTGGGGATCAAGCCTGA  
TTGGGAGAAAATAAAAATATTATATTTTACTGGATGAATTGTTTTAGTACCTAGAATGCAT  
GACCAAATCCCTTAACGTGAGTTTTTCGTTCCACTGAGCGTCAGACCCCGTAGAAAAG  
ATCAAAGGATCTTCTTGAGATCCTTTTTTTCTGCGCGTAATCTGCTGCTTGCAAACAAA  
AAAACCACCGCTACCAGCGGTGGTTTTGTTTGCCGGATCAAGAGCTACCAACTCTTTTT  
CCGAAGGTA ACTGGCTTCAGCAGAGCGCAGATACCAAATACTGTCCTTCTAGTGTAGC  
CGTAGTTAGGCCACCACTTCAAGAACTCTGTAGCACCGCCTACATACCTCGCTCTGCTA  
ATCCTGTTACCAGTGGCTGCTGCCAGTGGCGATAAGTTCGTGTCTTACCGGGTTGGACTC  
AAGACGATAGTTACCGGATAAGGCGCAGCGGTCGGGCTGAACGGGGGGTTCGTGCAC  
ACAGCCCAGCTTGGAGCGAACGACCTACACCGAACTGAGATACCTACAGCGTGAGCTA  
TGAGAAAGCGCCACGCTTCCCGAAGGGAGAAAGGCGGACAGGTATCCGGTAAGCGGC  
AGGGTCGGAACAGGAGAGCGCACGAGGGAGCTTCCAGGGGGAAACGCCTGGTATCTT  
TATAGTCTGTCGGGTTTCGCCACCTCTGACTTGAGCGTCGATTTTTGTGATGCTCGTC  
AGGGGGGCGGAGCCTATGGAAAACGCCAGCAACGCGGCCTTTTTACGGTTCCTGGC  
CTTTTGCTGGCCTTTTGCTCACATGTTCTTTCCTGCGTTATCCCCTGATTCTGTGGATAA  
CCGTATTACCGCCTTTGAGTGAGCTGATACCGCTCGCCGCAGCCGAACGACCGAGCGC  
AGCGAGTCAGTGAGCGAGGAAGCGGAAGAGCGCCTGATGCGGTATTTTCTCCTTACGC  
ATCTGTGCGGTATTTACACCGCATATGGTGCACTCTCAGTACAATCTGCTCTGATGCCG  
CATAGTTAAGCCAGTATACTCCGCTATCGCTACGTGACTGGGTCATGGCTGCGCCCC  
GACACCCGCCAACACCCGCTGACGCGCCCTGACGGGCTTGTCTGCTCCCGGCATCCGC  
TTACAGACAAGCTGTGACCGTCTCCGGGAGCTGCATGTGT CAGAGGTTTTACCGTCA  
TCACCGAAACGCGCGAGGCAGGGTGCCTTGATGTGGGCGCCGGCGGTGAGTGCCGA

CGGCGCGGCTTGTCCGCGCCCTGGTAGATTGCCTGGCCGTAGGCCAGCCATTTTTGAG  
CGGCCAGCGGCCGCGATAGGCCGACGCGAAGCGGCGGGGCGTAGGGAGCGCAGCGA  
CCGAAGGGTAGGCGCTTTTTGCAGCTCTTCGGCTGTGCGCTGGCCAGACAGTTATGCA  
CAGGCCAGGCGGGTTTTAAGAGTTTTAATAAGTTTTAAAGAGTTTTAGGCGGAAAAAT  
CGCCTTTTTTCTCTTTTATATCAGTCACTTACATGTGTGACCGGTTCCCAATGTACGGCT  
TTGGGTTCCCAATGTACGGGTTCCGGTTCCTCAATGTACGGCTTTGGGTTCCCAATGTAC  
GTGCTATCCACAGGAAACAGACCTTTTCGACCTTTTCCCTGCTAGGGCAATTTGCC  
TAGCATCTGCTCCGTACATTAGGAACCGGCGGATGCTTCGCCCTCGATCAGGTTGCGGT  
AGCGCATGACTAGGATCGGGCCAGCCTGCCCCGCCTCCTCCTTCAAATCGTACTCCGG  
CAGGTCATTTGACCCGATCAGCTTGCGCACGGTCAAACAGAACTTCTTGAACTCTCCG  
GCGCTGCCACTGCGTTCGTAGATCGTCTTGAACAACCATCTGGCTTCTGCCTTGCCTGC  
GGCGCGGCGTGCCAGGCGGTAGAGAAAACGGCCGATGCCGGGATCGATCAAAAAGTA  
ATCGGGGTGAACCGTCAGCACGTCCGGGTTCTTGCCCTTCTGTGATCTCGCGGTACATCC  
AATCAGCTAGCTCGATCTCGATGTACTCCGGCCGCCGGTTTTCGCTCTTTACGATCTTGT  
AGCGGCTAATCAAGGCTTACCCTCGGATACCGTCACCAGGCGGCCGTTCTTGGCCTT  
CTTCGTACGCTGCATGGCAACGTGCGTGGTGTAAACCGAATGCAGGTTTTCTACCAGGT  
CGTCTTTCTGCTTTCCGCCATCGGCTCGCCGGCAGAACTTGAGTACGTCGCCAACGTGT  
GGACGGAACACGCGGCCGGGCTTGTCTCCCTTCCCTTCCCGGTATCGGTTTCATGGATT  
GGTTAGATGGGAAACCGCCATCAGTACCAGGTCGTAATCCACACACTGGCCATGCCG  
GCCGGCCCTGCGGAAACCTCTACGTGCCCGTCTGGAAGCTCGTAGCGGATCACCTCGC  
CAGCTCGTCGGTCACGCTTCGACAGACGGAAAACGGCCACGTCCATGATGCTGCGACT  
ATCGCGGGTGCCACGTCATAGAGCATCGGAACGAAAAATCTGGTTGCTCGTCGCC  
TTGGGCGGCTTCCATCGACGGCGCACCGGCTGCCGGCGGTTGCCGGGATTCTTTGC  
GGATTGATCAGCGGCCGCTTGCCACGATTCACCGGGGCGTGCTTCTGCCTCGATGCG  
TTGCCGCTGGGCGGCCTGCGCGGCCTTCAACTTCTCCACCAGGTCATCACCCAGCGCC  
GCGCCGATTTGTACCGGGCCGGATGGTTTGCACCGCTCACGCCGATTCCTCGGGCTT  
GGGGTTCCAGTGCCATTGCAGGGCCGGCAGGCAACCCAGCCGCTTACGCCTGGCCA  
ACCGCCGTTTCTCCACACATGGGGCATTCCACGGCGTCGGTGCCGGTTGTTCTTGAT  
TTCCATGCCGCTCCTTTAGCCGCTAAAATTCATCTACTCATTTATTCATTTGCTCATTT  
ACTCTGGTAGCTGCGCGATGTATTAGATAGCAGCTCGGTAATGGTCTTGCCTTGGCGT  
ACCGCGTACATCTTACGCTTGGTGTGATCCTCCGCCGGCAACTGAAAGTTGACCCGCT  
TCATGGCTGGCGTGTCTGCCAGGCTGGCCAACGTTGCAGCCTTGCTGCTGCGTGCCT  
CGGACGGCCGGCACTTAGCGTGTGTTGTGCTTTTGTCTCATTTTCTTTACCTCATTAACT  
CAAATGAGTTTTGATTTAATTTACGCGGCCAGCGCCTGGACCTCGCGGGCAGCGTCGC  
CCTCGGGTTCTGATTCAAGAACGGTTGTGCCGGCGGGCGGCAGTGCCGGGTAGCTCAC  
GCGCTGCGTGATACGGGACTCAAGAATGGGCAGCTCGTACCCGGCCAGCGCCTCGGC  
AACCTCACCGCGATGCGCGTGCCTTTGATCGCCCCGCGACACGACAAAGGCCGCTTGT  
AGCCTTCCATCCGTGACCTCAATGCGCTGCTTAACCAGCTCCACCAGGTCGGCGGTGG  
CCCATATGTCGTAAGGGCTTGGCTGCACCGGAATCAGCACGAAGTCGGCTGCCTTGAT  
CGCGGACACAGCCAAGTCCGCCGCTGGGGCGCTCCGTGATCACTACGAAGTCGGC  
CCGGCCGATGGCCTTACGTGCGGTCAATCGTCGGGCGGTCGATGCCGACAACGGTT  
AGCGGTTGATCTTCCCGCACGGCCGCCAATCGCGGGCACTGCCCTGGGGATCGGAAT  
CGACTAACAGAACATCGGCCCCGGCGAGTTGCAGGGCGCGGGCTAGATGGGTTGCGA  
TGTCGTCTTGCCTGACCCGCCTTTCTGGTTAAGTACAGCGATAACCTTCATGCGTTCC

CCTTGCGTATTTGTTTATTTACTCATCGCATCATATACGCAGCGACCGCATGACGCAAGC  
TGTTTTACTCAAATACACATCACCTTTTTAGACGGCGGCGCTCGGTTTCTTCAGCGGCC  
AAGCTGGCCGGCCAGGCCGCCAGCTTGGCATCAGACAAACCGGCCAGGATTTTCATGC  
AGCCGCACGGTTGAGACGTGCGCGGGCGGCTCGAACACGTACCCGGCCGCGATCATC  
TCCGCCTCGATCTCTTCGGTAATGAAAAACGGTTCGTCCTGGCCGTCCTGGTGCGGTTT  
CATGCTTGTTCTCTTGGCGTTCATTCTCGGCGGCCGCCAGGGCGTCGGCCTCGGTCAA  
TGCCTCCTCACGGAAGGCACCGCGCCGCTGGCCTCGGTGGGCGTCACTTCTCGCTG  
CGCTCAAGTGCGCGGTACAGGGTTCGAGCGATGCACGCCAAGCAGTGCAGCCGCTCT  
TTCACGGTGCGGCCTTCTGGTTCGATCAGCTCGCGGGCGTGCGCGATCTGTGCCGGGG  
TGAGGGTAGGGCGGGGGCCAACTTCACGCCTCGGGCCTTGGCGGCCTCGCGCCCGC  
TCCGGGTGCGGTTCGATGATTAGGGAACGCTCGAACTCGGCAATGCCGGCGAACACGGT  
CAACACCATGCGGCCGGCCGGCGTGGTGGTGTGCGCCACGGCTCTGCCAGGCTACG  
CAGGCCCGCGCCGGCCTCCTGGATGCGCTCGGCAATGTCCAGTAGGTTCGCGGGTGCTG  
CGGGCCAGGCGGTCTAGCCTGGTCACTGTACAACGTCGCCAGGGCGTAGGTGGTCA  
AGCATCCTGGCCAGCTCCGGGCGGTTCGCGCCTGGTGCCGGTGATCTTCTCGGAAAACA  
GCTTGGTGACGCCGGCCGCGTGCAGTTCGGCCCGTTGGTTGGTCAAGTCTGGTTCGTC  
GGTGCTGACCGGGCATAGCCAGCAGGCCAGCGGCGGCGCTCTTGTTTCATGGCGTAA  
TGTCTCCGGTTCTAGTCGCAAGTATTCTACTTTATGCGACTAAAACACGCGACAAGAAA  
ACGCCAGGAAAAGGGCAGGGCGGCAGCCTGTGCGGTAACCTTAGGACTTGTGCGACAT  
GTCGTTTTTCAGAAGACGGCTGCACTGAACGTCAGAAGCCGACTGCACTATAGCAGCG  
GAGGGGTTGGATCAAAGTACTTTGATCCCGAGGGGAACCCTGTGGTTGGCATGCACAT  
ACAAATGGACGAACGATAAACCTTTTCACGCCCTTTTAAATATCCGATTATTCTAATAA  
ACGCTCTTTTCTCTTAG

**pYao plasmid:**

GTTTACCCGCCAATATATCCTGTCAAACACTGATAGTTTAAACTGAAGGCGGGAAACGA  
CAATCTGATCCAAGCTCAAGCTGCTCTAGCATTCCGCCATTCAGGCTGCGCAACTGTTGG  
GAAGGGCGATCGGTGCGGGCCTCTTCGCTATTACGCCAGCTGGCGAAAGGGGGATGTG  
CTGCAAGGCGATTAAGTTGGGTAACGCCAGGGTTTTCCAGTCACGACGTTGTAAAC  
GACGGCCAGTGCCAAGCTTCGACTTGCCTTCGCACAATACATCATTCTTCTTAGCTT  
TTTTTCTTCTTCTTCGTTTCATACAGTTTTTTTTTTGTTTATCAGCTTACATTTTCTGAACC  
GTAGCTTTCGTTTTTCTTTTAACTTTCCATTCGGAGTTTTTGTATCTTGTTTCATAGT  
TTGTCCCAGGATTAGAATGATTAGGCATCGAACCTTCAAGAATTTGATTGAATAAAACA  
TCTTCATTCTTAAGATATGAAGATAATCTTCAAAGGCCCTGGGAATCTGAAAGAAGA  
GAAGCAGGCCCATTTATATGGGAAAGAACAATAGTATTTCTTATATAGGCCCATTTAAGT  
TGAAAACAATCTTCAAAGTCCCACATCGCTTAGATAAGAAAACGAAGCTGAGTTTAT  
ATACAGCTAGAGTCGAAGTAGTGATTGGGAGACCAACCCAGTGGACATAAGCCTGTTC  
GGTTCGTAAGCTGTAATGCAAGTAGCGTATGCGCTCACGCAACTGGTCCAGAACCTTG  
ACCGAACGCAGCGGTGGTAACGGCGCAGTGGCGGTTTTTCATGGCTTGTTATGACTGTT  
TTTTTGGGGTACAGTCTATGCCTCGGGCATCCAAGCAGCAAGCGCGTTACGCCGTGGG  
TCGATGTTTGATGTTATGGAGCAGCAACGATGTTACGCAGCAGGGCAGTCGCCCTAAA  
ACAAAGTTAAACATCATGGGGGAAGCGGTGATCGCCGAAGTATCGACTCAACTATCAG  
AGGTAGTTGGCGTCATCGAGCGCCATCTCGAACCGACGTTGCTGGCCGTACATTTGTAC

GGCTCCGCAGTGGATGGCGGCCTGAAGCCACACAGTGATATTGATTTGCTGGTTACGG  
TGACCGTAAGGCTTGATGAAACAACGCGGCGAGCTTTGATCAACGACCTTTTGAAAC  
TTCGGCTTCCCCTGGAGAGAGCGAGATTCTCCGCGCTGTAGAAGTCACCATTGTTGTG  
CACGACGACATCATTCCGTGGCGTTATCCAGCTAAGCGCGAACTGCAATTTGGAGAAT  
GGCAGCGCAATGACATTCTTGCAGGTATCTTCGAGCCAGCCACGATCGACATTGATCTG  
GCTATCTTGCTGACAAAAGCAAGAGAACATAGCGTTGCCTTGGTAGGTCCAGCGGCGG  
AGGAACTCTTTGATCCGGTTCCTGAACAGGATCTATTTGAGGCGCTAAATGAAACCTTA  
ACGCTATGGAACCTCGCCGCCCGACTGGGCTGGCGATGAGCGAAATGTAGTGCTTACGT  
TGTCGCCGATTTGGTACAGCGCAGTAACCGGCAAAATCGCGCCGAAGGATGTGCTGC  
CGACTGGGCAATGGAGCGCCTGCCGCCCAGTATCAGCCCGTCATACTTGAAGCTAGA  
CAGGCTTATCTTGGACAAGAAGAAGATCGCTTGGCCTCGCGCGCAGATCAGTTGGAAG  
AATTTGTCCACTACGTGAAAGGCGAGATCACCAAGGTAGTCGGCAAATAATGTCTAGCT  
AGAAATTCGTTCAAGCCGACGCCGCTTCGCGGCGCGGCTTAACTCAAGCGTTAGATGC  
ACTAAGCACATAATTGCTCACAGCCAACTATCAGGTCAAGTCTGCTTTTATTATTTTA  
AGCGTGCATAATAAGCCGGTCTCGGTTTTAGAGCTAGAAATAGCAAGTTAAAATAAGGC  
TAGTCCGTTATCAACTTGAAAAAGTGGCACCGAGTCGGTGCTTTTTTTTGCAAAATTTT  
CCAGATCGATTTCTTCTCCTCTGTTCTTCGGCGTTCAATTTCTGGGGTTTTCTCTTCGT  
TTTTCTGTAACCTGAAACCTAAAATTTGACCTAAAAAAAATCTCAAATAATATGATTCAGT  
GGTTTTGTACTTTTCAGTTAGTTGAGTTTTGCAGTTCGATGAGATAAACCAATACCATG  
GTTATACTAGTGATGGGAAATTCATTGAAAACCCTAAACCCAAATCAACAGCTGCAATT  
CAAAAGGGGACTAATTGACAAACAAAAATTGATAACAAATAGAGGTAGGGGGAGAGT  
TTCGTACGCGACAATGAGATTGAGCTCTTGAGGACTTGTGAAGTTGCCAACGCACGAG  
TGAGTGACACTGGTCGGTTTTGTGAGCCGTAACAACGTAGTTCCATGAGCTCATCTTCCT  
CTTCTTTGTCTCCAGGGAATTTGAGTTCGACTTTCTACGCGAGGGGCCCTCGAGGAAGC  
TTCTAGATTTCTGAATCGAGCTTTCGGAATTTAACATAGAGAAGTTAGAGAGAGAATG  
AAAAGCCAAAGGAGGCGAAAATCGAACAAGGAAGAAGAAAGACAACTTTCGACAAA  
GACTGGTCGGTCGGTTTTGGTAGACAATTGAAATTAGATGGATGGTCCGGTTCGGTATA  
CTATAAGATTA AAAACAGTTTTAAATTCAGCTAAACCGAACTCATTGATTTTATTAAAC  
CGGAATCATCCGATTCGAGTTTGTA AAAAATACCGAAATTGAAAACACTAAACAAAA  
CTGTATTAAACTGTTACTGAAATAAGAGAATCTCCAATTCGGTTTACGTACTACTCTTC  
AGAAATCAGAACCAAAAATTCAGAAATCGGATTGAACCAAACTTAAATTGACGGTCCG  
GTTAGTCTTCGGCTCTACAAATTAAGGCCCAAGTTTCTGCTTTAAAAGAACGAAATAG  
TTAATGGGCTCAAACCATAGACCAGGTAAGTCATGGGCTTGGTTAGTCCGGGTCAACC  
CGGTAGACCCGATTCCTGAAGAAAACCTAGTGAAGGTTTAAAGTTGTAAACTTTCCG  
ACCAAATAAACAAAATCGTTTTCCAGCTTCTTCGTCGCCACTAAACCCTGAGGCTAA  
ACCTAGACGAGTCAAAGTGTA AAAATCGTTAAACCCTAAGAGGGAGTGAGAGAGAGAA  
GAATCTAGATGGATTACAAGGACCACGACGGGATTACAAGGACCACGACATTGATTA  
CAAGGATGATGATGACAAGATGGCTCCGAAGAAGAAGAGGAAGGTTGGCATCCACGG  
GGTGCCAGCTGCTGACAAGAAGTACTCGATCGGCCTCGATATTGGGACTAACTCTGTT  
GGCTGGGCCGTGATCACCGACGAGTACAAGGTGCCCTCAAAGAAGTTCAAGGTCCTG  
GGCAACACCGATCGGCATTCCATCAAGAAGAATCTCATTGGCGCTCTCCTGTTCGACA  
GCGGCGAGACGGCTGAGGCTACGCGGCTCAAGCGCACCGCCCGCAGGCGGTACACGC  
GCAGGAAGAATCGCATCTGCTACCTGCAGGAGATTTTCTCCAACGAGATGGCGAAGGT  
TGACGATTCTTTCTTCCACAGGCTGGAGGAGTCATTCCTCGTGGAGGAGGATAAGAAG

CACGAGCGGCATCCAATCTTCGGCAACATTGTGCGACGAGGTTGCCTACCACGAGAAGT  
ACCCTACGATCTACCATCTGCGGAAGAAGCTCGTGGACTCCACAGATAAGGCGGACCT  
CCGCCTGATCTACCTCGCTCTGGCCACATGATTAAGTTCAGGGGCCATTTCTGATCG  
AGGGGGATCTCAACCCGACAATAGCGATGTTGACAAGCTGTTTCATCCAGCTCGTGCA  
GACGTACAACCAGCTCTTCGAGGAGAACCCCATTAATGCGTCAGGCGTCGACGCGAA  
GGCTATCCTGTCCGCTAGGCTCTCGAAGTCTCGGCGCCTCGAGAACCTGATCGCCAG  
CTGCCGGGCGAGAAGAAGAACGGCCTGTTGCGGAATCTCATTGCGCTCAGCCTGGGG  
CTCACGCCAACTTCAAGTCGAATTTGATCTCGCTGAGGACGCCAAGCTGCAGCTCT  
CCAAGGACACATACGACGATGACCTGGATAACCTCCTGGCCAGATCGGCGATCAGTA  
CGCGGACCTGTTCTCGCTGCCAAGAATCTGTGCGACGCCATCCTCCTGTCTGATATTC  
TCAGGGTGAACACCGAGATTACGAAGGCTCCGCTCTCAGCCTCCATGATCAAGCGCTA  
CGACGAGCACCATCAGGATCTGACCCTCCTGAAGGCGCTGGTCAGGCAGCAGCTCCC  
CGAGAAGTACAAGGAGATCTTCTTCGATCAGTCGAAGAACGGCTACGCTGGGTACATT  
GACGGCGGGCCTCTCAGGAGGAGTTCTACAAGTTCATCAAGCCGATTCTGGAGAAGA  
TGGACGGCACGGAGGAGCTGCTGGTGAAGCTCAATCGCGAGGACCTCCTGAGGAAGC  
AGCGGACATTGATAACGGCAGCATCCCACACCAGATTCATCTCGGGGAGCTGCACGC  
TATCCTGAGGAGGCAGGAGGACTTCTACCCTTTCCTCAAGGATAACCGCGAGAAGATC  
GAGAAGATTCTGACTTTCAGGATCCCGTACTACGTCGGCCACTCGCTAGGGGCAACT  
CCCGCTTCGCTTGGATGACCCGCAAGTCAGAGGAGACGATCACGCCGTGGAACCTCG  
AGGAGGTGGTCGACAAGGGCGCTAGCGCTCAGTCGTTTCATCGAGAGGATGACGAATTT  
CGACAAGAACCTGCCAATGAGAAGGTGCTCCCTAAGCACTCGCTCCTGTACGAGTAC  
TTCACAGTCTACAACGAGCTGACTAAGGTGAAGTATGTGACCGAGGGCATGAGGAAG  
CCGGCTTTCCTGTCTGGGGAGCAGAAGAAGGCCATCGTGGACCTCCTGTTCAAGACCA  
ACCGGAAGGTCACGGTAAAGCAGCTCAAGGAGGACTACTTCAAGAAGATTGAGTGCT  
TCGATTCGGTTCGAGATCTCTGGCGTTGAGGACCGCTTCAACGCCTCCCTGGGGACCTA  
CCACGATCTCCTGAAGATCATTAAAGGATAAGGACTTCCCTGGACAACGAGGAGAATGAG  
GATATCCTCGAGGACATTGTGCTGACACTCACTCTGTTTCGAGGACCGGGAGATGATCG  
AGGAGCGCCTGAAGACTTACGCCCATCTCTTCGATGACAAGGTCATGAAGCAGCTCAA  
GAGGAGGAGGTACACCGGCTGGGGGAGGCTGAGCAGGAAGCTCATCAACGGCATTTCG  
GGACAAGCAGTCCGGGAAGACGATCCTCGACTTCCCTGAAGAGCGATGGCTTCGCGAA  
CCGCAATTTTCATGCAGCTGATTCACGATGACAGCCTCACATTCAAGGAGGATATCCAGA  
AGGCTCAGGTGAGCGGCCAGGGGACTCGCTGCACGAGCATATCGCGAACCTCGCTG  
GCTCGCCAGCTATCAAGAAGGGGATTCTGCAGACCGTGAAGGTTGTGGACGAGCTGG  
TGAAGGTCATGGGCAGGCACAAGCCTGAGAACATCGTCATTGAGATGGCCCCGGGAGA  
ATCAGACCACGCAGAAGGGCCAGAAGAACTCACGCGAGAGGATGAAGAGGATCGAG  
GAGGGCATTAAAGGAGCTGGGGTCCCAGATCCTCAAGGAGCACCCGGTGGAGAACACG  
CAGCTGCAGAATGAGAAGCTTACCTGTACTACCTCCAGAATGGCCGCGATATGTATGT  
GGACCAGGAGCTGGATATTAACAGGCTCAGCGATTACGACGTCGATCATATCGTTCCAC  
AGTCATTCTGAAGGATGACTCCATTGACAACAAGGTCCTCACCAGGTCGGACAAGAA  
CCGGGGCAAGTCTGATAATGTTCTTCAGAGGAGGTCGTTAAGAAGATGAAGAACTAC  
TGGCGCCAGCTCCTGAATGCCAAGCTGATCACGCGAGCGGAAGTTCGATAACCTCACAA  
AGGCTGAGAGGGGCGGGCTCTCTGAGCTGGACAAGGCGGGCTTCATCAAGAGGCAGC  
TGGTCGAGACACGGCAGATCACTAAGCACGTTGCGCAGATTCTCGACTCACGGATGAA  
CACTAAGTACGATGAGAATGACAAGCTGATCCGCGAGGTTGAAGGTCATCACCTGAAG

TCAAAGCTCGTCTCCGACTTCAGGAAGGATTTCCAGTTCTACAAGGTTCTGGGAGATCA  
ACAATTACCACCATGCCATGACGCGTACCTGAACGCGGTGGTCGGCACAGCTCTGAT  
CAAGAAGTACCCAAAGCTCGAGAGCGAGTTCGTGTACGGGGACTACAAGGTTTACGA  
TGTGAGGAAGATGATCGCCAAGTCGGAGCAGGAGATTGGCAAGGCTACCGCCAAGTA  
CTTCTTCTACTCTAACATTATGAATTTCTTCAAGACAGAGATCACTCTGGCCAATGGCG  
AGATCCGGAAGCGCCCCCTCATCGAGACGAACGGCGAGACGGGGGAGATCGTGTGGG  
ACAAGGGCAGGGATTTCTCGGACCGTCAGGAAGGTTCTCTCCATGCCACAAGTGAATAT  
CGTCAAGAAGACAGAGGTCCAGACTGGCGGGTTCTCTAAGGAGTCAATTCTGCCTAA  
GCGGAACAGCGACAAGCTCATCGCCCGCAAGAAGGACTGGGATCCGAAGAAGTACGG  
CGGGTTCGACAGCCCCACTGTGGCCTACTCGGTCCTGGTTGTGGCGAAGGTTGAGAAG  
GGCAAGTCCAAGAAGCTCAAGAGCGTGAAGGAGCTGCTGGGGATCACGATTATGGAG  
CGCTCCAGCTTCGAGAAGAACCCGATCGATTTCTGGAGGCGAAGGGCTACAAGGAG  
GTGAAGAAGGACCTGATCATTAAAGCTCCCCAAGTACTCACTCTTCGAGCTGGAGAACG  
GCAGGAAGCGGATGCTGGCTTCCGCTGGCGAGCTGCAGAAGGGGAACGAGCTGGCTC  
TGCCGTCCAAGTATGTGAACCTTCTCTACCTGGCCTCCCACTACGAGAAGCTCAAGGG  
CAGCCCCGAGGACAACGAGCAGAAGCAGCTGTTTCGTGAGCAGCACAAGCATTACCT  
CGACGAGATCATTGAGCAGATTTCCGAGTTCTCCAAGCGCGTGATCCTGGCCGACGCG  
AATCTGGATAAGGTCCTCTCCGCGTACAACAAGCACCGCGACAAGCCAATCAGGGAGC  
AGGCTGAGAATATCATTATCTCTTACCCTGACGAACCTCGGCGCCCCTGCTGCTTTC  
AAGTACTTCGACACAACACTATCGATCGCAAGAGGTACACAAGCACTAAGGAGGTCCTGG  
ACGCGACCCTCATCCACCAGTCGATTACCGGCCTCTACGAGACGCGCATCGACCTGTC  
TCAGCTCGGGGGCGACAAGCGGCCAGCGGCGACGAAGAAGGCGGGGCAGGCGAAGA  
AGAAGAAGTGAGCTCAGAGCTTTCGTTTCGTATCATCGGTTTCGACAACGTTTCGTCAAG  
TTCAATGCATCAGTTTCATTGCGCACACACCAGAATCCTACTGAGTTTGAGTATTATGGC  
ATTGGGAAAACGTTTTTCTTGTACCATTGTTGTGCTTGTAAATTTACTGTGTTTTTTATT  
CGTTTTTCGCTATCGAACTGTGAAATGGAAATGGATGGAGAAGAGTTAATGAATGATAT  
GGTCCTTTTGTTCATTCTCAAATTAATATATTTGTTTTTCTCTTATTTGTTGTGTGTTGA  
ATTTGAAATTATAAGAGATATGCAAACATTTTGTTTTGTGAGTAAAAATGTGTCAAATCGTG  
GCCTCTAATGACCGAAGTTAATATGAGGAGTAAACACTTGTAGTTGTACCATTATGCTT  
ATTCCTAGGCAACAAATATATTTTCAGACCTAGAAAAGCTGCAAATGTTACTGAATAC  
AAGTATGTCTCTTGTGTTTTAGACATTTATGAACTTTCCTTTATGTAATTTTCCAGAATC  
CTTGTGAGATTCTAATCATTGCTTTATAATTATAGTTATACTCATGGATTTGTAGTTGAGTA  
TGAAAATATTTTTAATGCATTTTATGACTTGCCAATTGATTGACAACGAATTCGTAATCA  
TGTCATAGCTGTTTCTGTGTGAAATTGTTATCCGCTCACAATTCACACAACATACGA  
GCCGGAAGCATAAAGTGTAAGCCTGGGGTGCCTAATGAGTGAGCTAACTCACATTAA  
TTGCGTTGCGCTCACTGCCCCGCTTCCAGTCGGGAAACCTGTGCTGCCAGCTGCATTAA  
TGAATCGGCCAACGCGCGGGGAGAGGGCGTTTTGCGTATTGGCTAGAGCAGCTTGCCA  
ACATGGTGGAGCACGACACTCTCGTCTACTCCAAGAATATCAAAGATACAGTCTCAGA  
AGACCAAAGGGCTATTGAGACTTTTCAACAAAGGGTAATATCGGGAAACCTCCTCGGA  
TTCCATTGCCAGCTATCTGTCACTTCATCAAAGGACAGTAGAAAAGGAAGGTGGCA  
CCTACAAATGCCATCATTGCGATAAAGGAAAGGCTATCGTTCAAGATGCCTCTGCCGAC  
AGTGGTCCCAAAGATGGACCCCCACCCACGAGGAGCATCGTGGAAAAAGAAGACGTT  
CCAACCACGTCTTCAAAGCAAGTGGATTGATGTGAACATGGTGGAGCACGACACTCTC  
GTCTACTCCAAGAATATCAAAGATACAGTCTCAGAAGACCAAAGGGCTATTGAGACTT



TTCAACAAAGGGTAATATCGGGAAACCTCCTCGGATTCCATTGCCAGCTATCTGTCAC  
TTCATCAAAGGACAGTAGAAAAGGAAGGTGGCACCTACAAATGCCATCATTGCGATA  
AAGGAAAGGCTATCGTTCAAGATGCCTCTGCCGACAGTGGTCCCAAAGATGGACCCC  
ACCCACGAGGAGCATCGTGGA AAAAGACGTTCCAACCACGTCTTCAAAGCAAGT  
GGATTGATGTGATATCTCCACTGACGTAAGGGATGACGCACAATCCC ACTATCCTTCGC  
AAGACCCTCCTCTATATAAGGAAGTTCATTTCAATTTGGAGAGGACACGCTGAAATCAC  
CAGTCTCTCTACAAATCTATCTCTCTCGAGCTTTCGCAGATCCGGGGGGCAATGAGA  
TATGAAAAAGCCTGAACTACCGCGACGTCTGTGCGAGAAGTTTCTGATCGAAAAGTTC  
GACAGCGTCTCCGACCTGATGCAGCTCTCGGAGGGCGAAGAATCTCGTGCTTTCAGCT  
TCGATGTAGGAGGGCGTGGATATGTCCTGCGGGTAAATAGCTGCGCCGATGGTTTCTAC  
AAAGATCGTTATGTTTATCGGCAC TTTGCATCGGCCGCGCTCCCGATTCCGGAAGTGCT  
TGACATTGGGGAGTTTAGCGAGAGCCTGACCTATTGCATCTCCCGCCGTTACAGGGT  
GTCACGTTGCAAGACCTGCCTGAAACCGAACTGCCCGCTGTTCTACAACCGGTGCGCG  
AGGCTATGGATGCGATCGCTGCGGCCGATCTTAGCCAGACGAGCGGGTTCGGCCCATT  
CGGACCGCAAGGAATCGGTCAATACTACATGGCGTGATTTCAATGCGCGATTGCTG  
ATCCCATGTGTATCACTGGCAA ACTGTGATGGACGACACCGTCAGTGCGTCCGTCGC  
GCAGGCTCTCGATGAGCTGATGCTTTGGGCCGAGGACTGCCCGAAGTCCGGCACCTC  
GTGCACGCGGATTCGGCTCCAACAATGTCCTGACGGACAATGGCCGCATAACAGCGG  
TCATTGACTGGAGCGAGGCGATGTTGCGGGATTCCCAATACGAGGTCGCCAACATCTT  
CTTCTGGAGGCCGTGGTTGGCTTGTATGGAGCAGCAGACGCGCTACTTCGAGCGGAGG  
CATCCGGAGCTTGCAGGATCGCCACGACTCCGGGCGTATATGCTCCGCATTGGTCTTGA  
CCA ACTCTATCAGAGCTTGGTTGACGGCAATTCGATGATGCAGCTTGGGCGCAGGGT  
CGATGCGACGCAATCGTCCGATCCGGAGCCGGGACTGTGCGGGCGTACACAAATCGCCC  
GCAGAAGCGCGGCCGTCTGGACCGATGGCTGTGTAGAAGTACTCGCCGATAGTGAA  
ACCGACGCCCCAGCACTCGTCCGAGGGCAAAGAAATAGAGTAGATGCCGACCGGGAT  
CTGTCGATCGACAAGCTCGAGTTTCTCATAATAATGTGTGAGTAGTTCCAGATAAGG  
GAATTAGGGTTCCTATAGGGTTTCGCTCATGTGTTGAGCATATAAGAAACCCTTAGTATG  
TATTTGTATTTGAAAATACTTCTATCAATAAAATTTCTAATTCCTAAAACCAAATCCAG  
TACTAAAATCCAGATCCCCGAATTAATTCGGCGTTAATTCAGTACATTA AAAACGTCC  
GCAATGTGTTATTAAGTTGTCTAAGCGTCAATTTGTTTACACCACAATATATCCTGCCAC  
CAGCCAGCCAACAGCTCCCCGACCGGCAGCTCGGCACAAAATCACC ACTCGATACAG  
GCAGCCCATCAGTCCGGGACGGCGTCAGCGGGAGAGCCGTTGTAAGGCGGCAGACTT  
TGCTCATGTTACCGATGCTATTCGGAAGAACGGCAACTAAGCTGCCGGGTTTGAAACA  
CGGATGATCTCGCGGAGGGTAGCATGTTGATTGTAACGATGACAGAGCGTTGCTGCCT  
GTGATCACCGCGGTTTCAA AATCGGCTCCGTCGATACTATGTTATACGCCAACTTTGAA  
AACAACTTTGAAAAAGCTGTTTTCTGGTATTTAAGGTTTTAGAAATGCAAGGAACAGTG  
AATTGGAGTTCGTCTTGTATAATTAGCTTCTTGGGGTATCTTTAAATACTGTAGAAAAG  
AGGAAGGAAATAATAAATGGCTAAAATGAGAATATCACC GGAATTGAAAAA ACTGATC  
GAAAAATACCGCTGCGTAAAAGATACGGAAGGAATGTCTCCTGCTAAGGTATATAAGCT  
GGTGGGAGAAAATGAAAACCTATATTTAAAAATGACGGACAGCCGGTATAAAGGGACC  
ACCTATGATGTGGAACGGGAAAAGGACATGATGCTATGGCTGGAAGGAAAGCTGCCTG  
TTCAAAGGTCCTGCACTTTGAACGGCATGATGGCTGGAGCAATCTGCTCATGAGTGA  
GGCCGATGGCGTCTTTGCTCGGAAGAGTATGAAGATGAACAAAGCCCTGAAAAGATT  
ATCGAGCTGTATGCGGAGTGCATCAGGCTCTTTC ACTCCATCGACATATCGGATTGTCC

CTATACGAATAGCTTAGACAGCCGCTTAGCCGAATTGGATTACTTACTGAATAACGATCT  
GGCCGATGTGGATTGCGAAAACCTGGGAAGAAGACACTCCATTTAAAGATCCGCGCGA  
GCTGTATGATTTTTTAAAGACGGAAAAGCCCGAAGAGGAACTTGTCTTTTCCCACGGC  
GACCTGGGAGACAGCAACATCTTTGTGAAAGATGGCAAAGTAAGTGGCTTTATTGATC  
TTGGGAGAAGCGGCAGGGCGGACAAGTGGTATGACATTGCCTTCTGCGTCCGGTCGAT  
CAGGGAGGATATCGGGGAAGAACAGTATGTGCGAGCTATTTTTGACTTACTGGGGATCA  
AGCCTGATTGGGAGAAAATAAAATATTATATTTTACTGGATGAATTGTTTTAGTACCTAG  
AATGCATGACCAAATCCCTTAACGTGAGTTTTTCGTTCCACTGAGCGTCAGACCCCGTA  
GAAAAGATCAAAGGATCTTCTTGAGATCCTTTTTTTCTGCGCGTAATCTGCTGCTTGCA  
AACAAAAAACACCGCTACCAGCGGTGGTTTTGTTTGCCGGATCAAGAGCTACCAACT  
CTTTTTCCGAAGGTAAGTGGCTTCAGCAGAGCGCAGATACCAAATACTGTCTTCTAGT  
GTAGCCGTAGTTAGGCCACCACTTCAAGAACTCTGTAGCACCGCCTACATACCTCGCTC  
TGCTAATCCTGTTACCAGTGGCTGCTGCCAGTGGCGATAAGTCGTGTCTTACCGGGTTG  
GACTCAAGACGATAGTTACCGGATAAGGCGCAGCGGTCCGGCTGAACGGGGGGTTG  
TGCACACAGCCCAGCTTGGAGCGAACGACCTACACCGAACTGAGATACCTACAGCGT  
GAGCTATGAGAAAGCGCCACGCTTCCCGAAGGGAGAAAGGCGGACAGGTATCCGGTA  
AGCGGCAGGGTCCGAACAGGAGAGCGCACGAGGGAGCTTCCAGGGGGAAACGCCTG  
GTATCTTTATAGTCTGTGCGGGTTTCGCCACCTCTGACTTGAGCGTCGATTTTTGTGATG  
CTCGTCAGGGGGGCGGAGCCTATGGAAAACGCCAGCAACGCGGCCTTTTTACGGTTC  
CTGGCCTTTTGCTGGCCTTTTGCTCACATGTTCTTTCCTGCGTTATCCCTGATTCTGTG  
GATAACCGTATTACCGCCTTTGAGTGAGCTGATACCGCTCGCCGACCCGAACGACCG  
AGCGCAGCGAGTCAGTGAGCGAGGAAGCGGAAGAGCGCCTGATGCGGTATTTTCTCC  
TTACGCATCTGTGCGGTATTTACACCCGCATATGGTGCACCTCTCAGTACAATCTGCTCTG  
ATGCCGCATAGTTAAGCCAGTATACTCCGCTATCGCTACGTGACTGGGTGATGGCTG  
CGCCCCGACACCCGCCAACACCCGCTGACGCGCCCTGACGGGCTTGTCTGCTCCCGGC  
ATCCGCTTACAGACAAGCTGTGACCGTCTCCGGGAGCTGCATGTGTCAGAGGTTTTCA  
CCGTATCACCGAAACGCGCGAGGCAGGGTGCCTTGATGTGGGCGCCGGCGGTTCGAG  
TGGCGACGGCGCGGCTTGTCCGCGCCCTGGTAGATTGCCTGGCCGTAGGCCAGCCATT  
TTTGAGCGGCCAGCGGCCGCGATAGGCCGACGCGAAGCGGCGGGGCGTAGGGAGCGC  
AGCGACCGAAGGGTAGGGCGCTTTTTGCAGCTCTTCGGCTGTGCGCTGGCCAGACAGTT  
ATGCACAGGCCAGGCGGGTTTTAAGAGTTTTAATAAGTTTTAAAGAGTTTTAGGCGGA  
AAAATCGCCTTTTTTCTCTTTTATATCAGTCACTTACATGTGTGACCGGTTCCCAATGTA  
CGGCTTTGGGTTCCCAATGTACGGGTTCCGGTTCCTCAATGTACGGCTTTGGGTTCCCAA  
TGACGTGCTATCCACAGGAAACAGACCTTTTCGACCTTTTTCCCCTGCTAGGGCAATT  
TGCCCTAGCATCTGCTCCGTACATTAGGAACCGGCGGATGCTTCGCCCTCGATCAGGTT  
GCGGTAGCGCATGACTAGGATCGGGCCAGCCTGCCCCGCCTCCTCCTTCAAATCGTACT  
CCGGCAGGTCATTTGACCCGATCAGCTTGCACAGGTGAAACAGAACTTCTTGAAGTCT  
TCCGGCGCTGCCACTGCGTTCGTAGATCGTCTTGAACAACCATCTGGCTTCTGCCTTGC  
CTGCGGCGCGGCGTGCCAGGCGGTAGAGAAAACGGCCGATGCCGGGATCGATCAAAA  
AGTAATCGGGGTGAACCGTCAGCACGTCCGGGTTCTTGCCTTCTGTGATCTCGCGGTA  
CATCCAATCAGCTAGCTCGATCTCGATGTACTCCGGCCGCCCGGTTTCGCTCTTTACGAT  
CTTGTAGCGGCTAATCAAGGCTTACCCTCGGATACCGTCACCAGGCGGCCGTTCTTG  
CCTTCTTCGTACGCTGCATGGCAACGTGCGTGGTGTTTAACCGAATGCAGGTTTCTACC  
AGGTCGTCTTTCTGCTTTCCGCCATCGGCTCGCCGGCAGAACTTGAGTACGTCCGCAA

CGTGTGGACGGAACACGCGGCCGGGCTTGTCTCCCTTCCCTTCCCGGTATCGGTTTCATG  
GATTCGGTTAGATGGGAAACCGCCATCAGTACCAGGTCGTAATCCCACACACTGGCCAT  
GCCGGCCGGCCCTGCGGAAACCTCTACGTGCCCGTCTGGAAGCTCGTAGCGGATCACC  
TCGCCAGCTCGTCGGTCACGCTTCGACAGACGGAAAACGGCCACGTCCATGATGCTGC  
GACTATCGCGGGTGCCACGTCATAGAGCATCGGAACGAAAAAATCTGGTTGCTCGTC  
GCCCTTGGGCGGCTTCCTAATCGACGGCGCACCGGCTGCCGGCGGTTGCCGGGATTCT  
TTGCGGATTCGATCAGCGGCCGCTTGCCACGATTCACCGGGGCGTGCTTCTGCCTCGAT  
GCGTTGCCGCTGGGCGGCCTGCGCGGCCTTCAACTTCTCCACCAGGTCATACCCAGC  
GCCGCGCCGATTTGTACCGGGCCGGATGGTTTGCACCGCTCACGCCGATTCCTCGGG  
CTTGGGGGTTCCAGTGCCATTGCAGGGCCGGCAGGCAACCCAGCCGCTTACGCCTGGC  
CAACCGCCCGTTCTCCACACATGGGGCATTCCACGGCGTCGGTGCCTGGTTGTTCTT  
GATTTTCCATGCCGCCTCCTTTAGCCGCTAAAATTCATCTACTCATTATTATTGCTCA  
TTACTCTGGTAGCTGCGCGATGTATTAGATAGCAGCTCGGTAATGGTCTTGCCCTGGC  
GTACCGCGTACATCTTCAGCTTGGTGTGATCCTCCGCCGGCAACTGAAAGTTGACCCG  
CTTCATGGCTGGCGTGTCTGCCAGGCTGGCCAACGTTGCAGCCTTGCTGCTGCGTGCG  
CTCGGACGGCCGGCACTTAGCGTGTGGTGCTTTTGCTCATTCTTTACCTCATTA  
CTCAAATGAGTTTTGATTTAATTCAGCGGCCAGCGCCTGGACCTCGCGGGCAGCGTC  
GCCCTCGGGTTCTGATTCAAGAACGGTTGTGCCGGCGGCGGCAGTGCCTGGGTAGCTC  
ACGCGCTGCGTGATACGGGACTCAAGAATGGGCAGCTCGTACCCGGCCAGCGCCTCG  
GCAACCTCACCGCCGATGCGCGTGCCTTTGATCGCCCGGACACGACAAAGGCCGCTT  
GTAGCCTTCCATCCGTGACCTCAATGCGCTGCTTAACCAGCTCCACCAGGTCGGCGGT  
GGCCCATATGTCGTAAGGGCTTGGCTGCACCGGAATCAGCACGAAGTCGGCTGCCTTG  
ATCGCGGACACAGCCAAGTCCGCCGCCTGGGGCGCTCCGTCGATCACTACGAAGTCG  
GCCGGCCGATGGCCTTACGTGCGGGTCAATCGTCGGGCGGTCGATGCCGACAACGGT  
TAGCGGTTGATCTTCCCGCACGGCCGCCAATCGCGGGCACTGCCCTGGGGATCGGAA  
TCGACTAACAGAACATCGGCCCCGGCGAGTTGCAGGGCGCGGGCTAGATGGGTTGCG  
ATGGTCGTCTTGCTGACCCGCCTTTCTGGTTAAGTACAGCGATAACCTTCATGCGTTC  
CCCTTGCGTATTTGTTTATTTACTCATCGCATCATATACGCAGCGACCGCATGACGCAAG  
CTGTTTTACTCAAATACACATCACCTTTTTAGACGGCGGCGCTCGGTTTCTTCAGCGGC  
CAAGCTGGCCGGCCAGGCCGCCAGCTTGGCATCAGACAAACCGGCCAGGATTTTCATG  
CAGCCGCACGGTTGAGACGTGCGCGGGCGGCTCGAACACGTACCCGGCCGCGATCAT  
CTCCGCCTCGATCTCTTCGGTAATGAAAAACGGTTCGTCTGGCCGTCCTGGTGCGGTT  
TCATGCTTGTTCCTCTTGGCGTTCATTCTCGGCGGCCGCCAGGGCGTCGGCCTCGGTCA  
ATGCGTCTCACGGAAGGCACCGCGCCGCCTGGCCTCGGTGGGCGTCACTTCCTCGCT  
GCGCTCAAGTGCGCGGTACAGGGTCGAGCGATGCACGCCAAGCAGTGCAGCCGCCTC  
TTTACGGTGCGGCCTTCTGGTCGATCAGCTCGCGGGCGTGCGCGATCTGTGCCGGG  
GTGAGGGTAGGGCGGGGGCCAACTTACGCCTCGGGCCTTGGCGGCCTCGCGCCCG  
CTCCGGGTGCGGTTCGATGATTAGGGAACGCTCGAACTCGGCAATGCCGGCGAACACG  
GTCAACACCATGCGGCCGGCCGGCGTGGTGGTGTGCGCCACGGCTCTGCCAGGCTAC  
GCAGGCCCGCGCCGGCCTCCTGGATGCGCTCGGCAATGTCCAGTAGGTCGCGGGTGCT  
GCGGGCCAGGCGGTCTAGCCTGGTCACTGTCAACGTCGCCAGGGCGTAGGTGGTC  
AAGCATCCTGGCCAGCTCCGGGCGGTGCGGCCTGGTGCCGGTGATCTTCTCGGAAAC  
AGCTTGGTGCAGCCGGCCGCGTGCAGTTCGGCCCGTTGGTTGGTCAAGTCTGGTTCG  
CGGTGCTGACGCGGGCATAGCCAGCAGGCCAGCGGCGGCGCTTGTTCATGGCGTA

ATGTCTCCGGTTCTAGTCGCAAGTATTCTACTTTATGCGACTAAAACACGCGACAAGAA  
AACGCCAGGAAAAGGGCAGGGCGGCAGCCTGTCGCGTAACTTAGGACTTGTGCGACA  
TGTCGTTTTTCAGAAGACGGCTGCACTGAACGTCAGAAGCCGACTGCACTATAGCAGCG  
GAGGGGTTGGATCAAAGTACTTTGATCCCGAGGGGAACCCTGTGGTTGGCATGCACAT  
ACAAATGGACGAACGGATAAACCTTTTCACGCCCTTTTAAATATCCGATTATTCTAATAA  
ACGCTCTTTTCTCTTAG
